# Supplementary material for: Pyrochlore Ta-doped antimony oxide as a novel adsorbent for efficient strontium removal
Source: Royal Society of Chemistry journal article supplement (doi:10.1039/c4ra13992e), 2015-01-01
Supplement: c4ra13992e1.pdf [file c4ra13992e1.pdf]

## Supporting information

### **Pyrochlore Ta-doped antimony as novel adsorbents for efficient strontium removal**

Wanjun Mu, Rui Zhang , Xingliang Li, Xiang Xie, Qianhong Yu, Kai Lv, Hongyuan  
Wei\*, Yuan Jian

*Institute of Nuclear Physics and Chemistry, China Academy of Engineering Physics,  
64# Mianshan Road, Mianyang, 621900, Sichuan Province, P. R. China*

---

\*Corresponding author: Tel: +86 816 2494854.

*E-mail address:* muwj2014@163.com

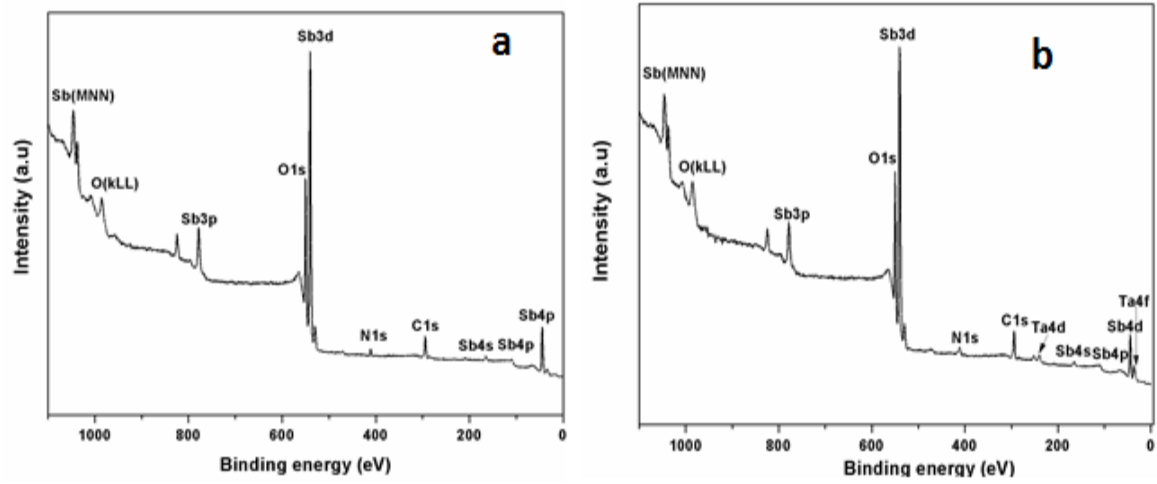

**Fig.1** The XPS spectra of (a) TaSb-0 sample and (b) TaSb-0.12 sample

**Table 1 kinetic parameters for Sr<sup>2+</sup> sorption onto TaSb-0 and TaSb-0.12 samples**

| Model                             | Parameters                                    | TaSb-0 | TaSb-0.12             |
|-----------------------------------|-----------------------------------------------|--------|-----------------------|
| Experiment                        | $q_e$ (mg g <sup>-1</sup> )                   | 12     | 26                    |
| Pseudo first-order kinetic model  | $k_1$ (min <sup>-1</sup> )                    | 0.11   | 0.071                 |
|                                   | $q_e^{cal}$ (mg g <sup>-1</sup> )             | 11.95  | 26.97                 |
|                                   | R <sup>2</sup>                                | 0.9756 | 0.9502                |
| Pseudo second-order kinetic model | $k_2$ (g mg <sup>-1</sup> min <sup>-1</sup> ) | 0.32   | 5.07×10 <sup>-3</sup> |
|                                   | $q_e^{cal}$ (mg g <sup>-1</sup> )             | 12.02  | 26.01                 |
|                                   | R <sup>2</sup>                                | 0.9992 | 0.9999                |
